# Supplementary material for: Active and dynamic infrared switching of VO2 (M) nanoparticle film on ITO glass
Source: Royal Society of Chemistry journal article supplement (doi:10.1039/c5tc04046a), 2016-01-01
Supplement: c5tc04046a1.pdf [file c5tc04046a1.pdf]

Electronic Supplementary Information

***Active and Dynamic Infrared Switching of VO<sub>2</sub> (M) Nanoparticles Film on ITO Glass***

Ming Li,<sup>a</sup> Hao Wu,<sup>a</sup> Li Zhong,<sup>a</sup> Hua Wang,<sup>a</sup> Yuanyuan Luo<sup>a</sup> and Guanghai Li<sup>\*a,b</sup>

<sup>a</sup>Key Laboratory of Materials Physics, Anhui Key Laboratory of Nanomaterials and Nanotechnology  
Institute of Solid State Physics, Chinese Academy of Sciences, Hefei 230031, P. R. China

<sup>b</sup>University of Science and Technology of China, Hefei 230026, P. R. China

\* Address correspondence to this author, E-mail: [ghli@issp.ac.cn](mailto:ghli@issp.ac.cn)

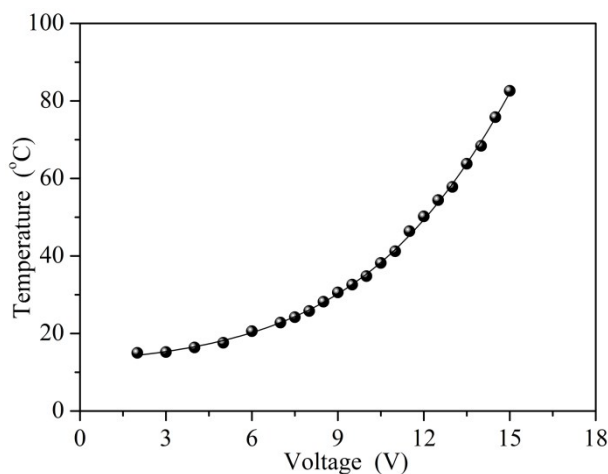

**Fig. S1** Temperature profile of ITO glass substrate upon applied voltage. One can see the temperature increases with increasing applied voltage and is over 80 °C at 15 V, which is higher than the phase transition temperature of VO<sub>2</sub> (M).

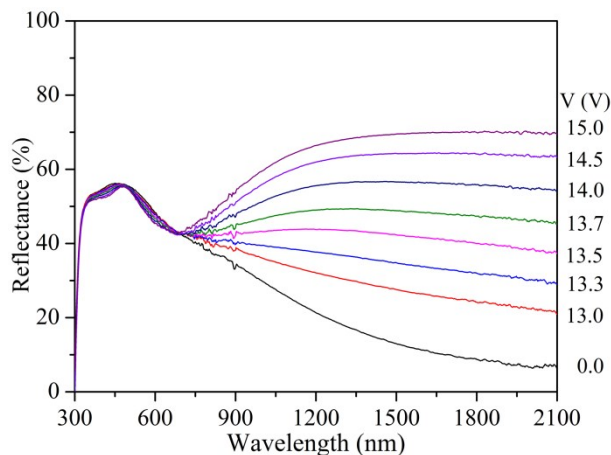

**Fig. S2** Dependence of reflectance of V3 device on the applied voltage. The reflectance was calculated from transmittance (R) and absorption (A) in Fig. 3 by the formula  $R+T+A=1$ . One can see the reflectance increases with increasing input voltage, which is different from our previous work (reference 26), in which the reflectance was directly measured by UV-3600 spectrophotometer with diffuse reflection mode and decreases with increasing input voltage.
